# Supplementary material for: The HARE chip for efficient time-resolved serial synchrotron crystallography
Source: PubMed Central journal article supplement (PMC7064102; doi:10.1107/s1600577520000685), 2020-02-27

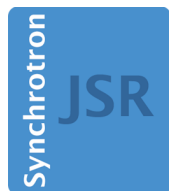

JOURNAL OF  
SYNCHROTRON  
RADIATION

**Volume 27 (2020)**

**Supporting information for article:**

**The HARE chip for efficient time-resolved serial synchrotron crystallography**

**Pedram Mehrabi, Henrike Müller-Werkmeister, Jan-Philipp Leimkohl, Hendrik Schikora, Jelena Ninkovic, Silvia Krivokuca, Ladislav Andriček, Sascha W. Epp, Darren Sherrel, Robin L. Owen, Arwen R. Pearson, Friedjof Tellkamp, Eike C. Schulz and R. J. Dwayne Miller**

**Figure S1** SEM images of the HARE chip at different magnifications.

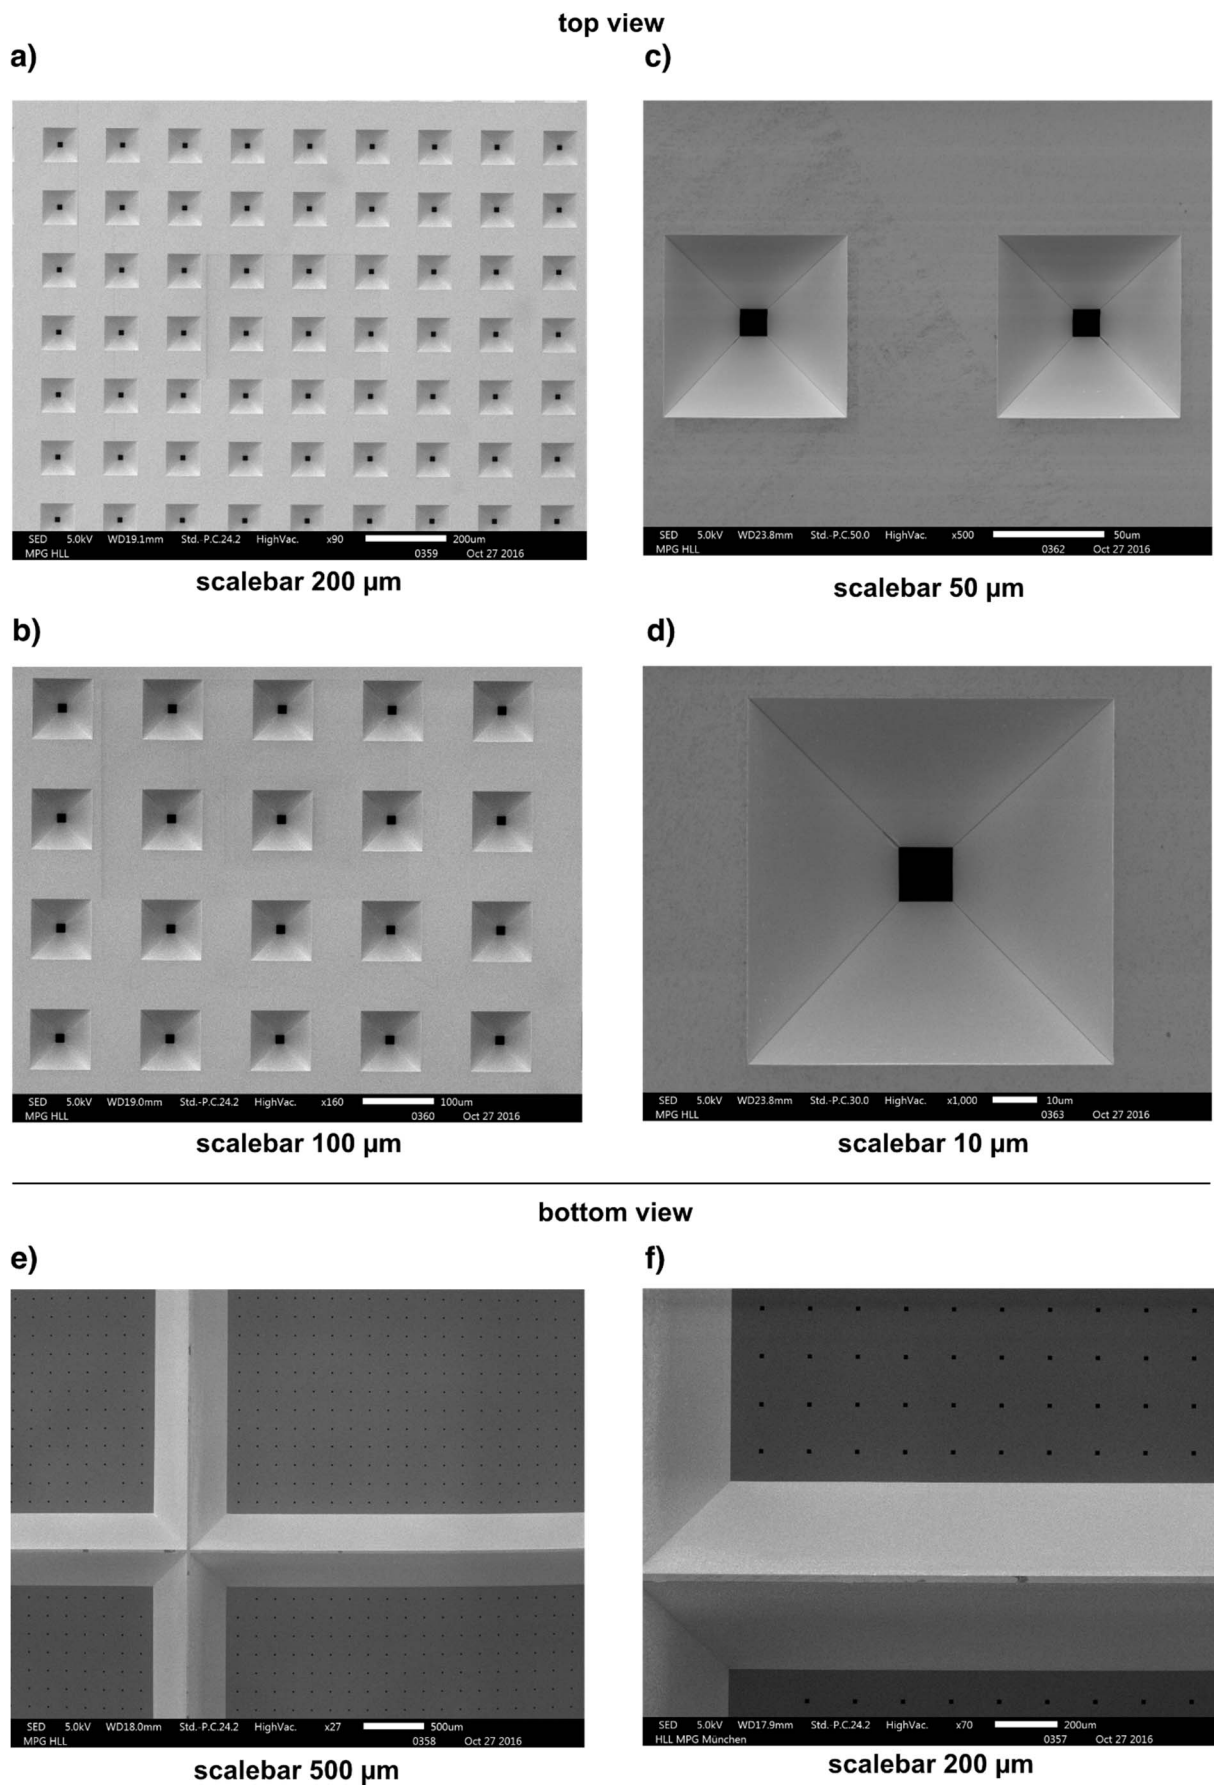

Supplement: s-27-00360-sup1.pdf [file s-27-00360-sup1.pdf]
